# Supplementary material
Source: publisher site journal article supplement (https://www.spandidos-publications.com/4928/downloadSupplementary)

Figure S1. NAP effect on U87MG cells migration cultured in normoxia or in DFX-induced hypoxia. (A) Microphotographs show the scraped area of U87MG cells monolayer cultured under normoxia (Control) or hypoxia (DFX), alone or in combination with NAP for 24 h. (B) The bar graph shows percentage wound closure measured 24 h after scratch formation observed in two random fields per well in duplicate wells and expressed as a percentage respect to control (%). \*\*\* $P < 0.001$  vs. Control; ### $P < 0.001$  vs. DFX and §§ $P < 0.01$  vs. Control NAP as determined by one-way ANOVA followed by Tukey's post-hoc test. DFX, deferoxamine.

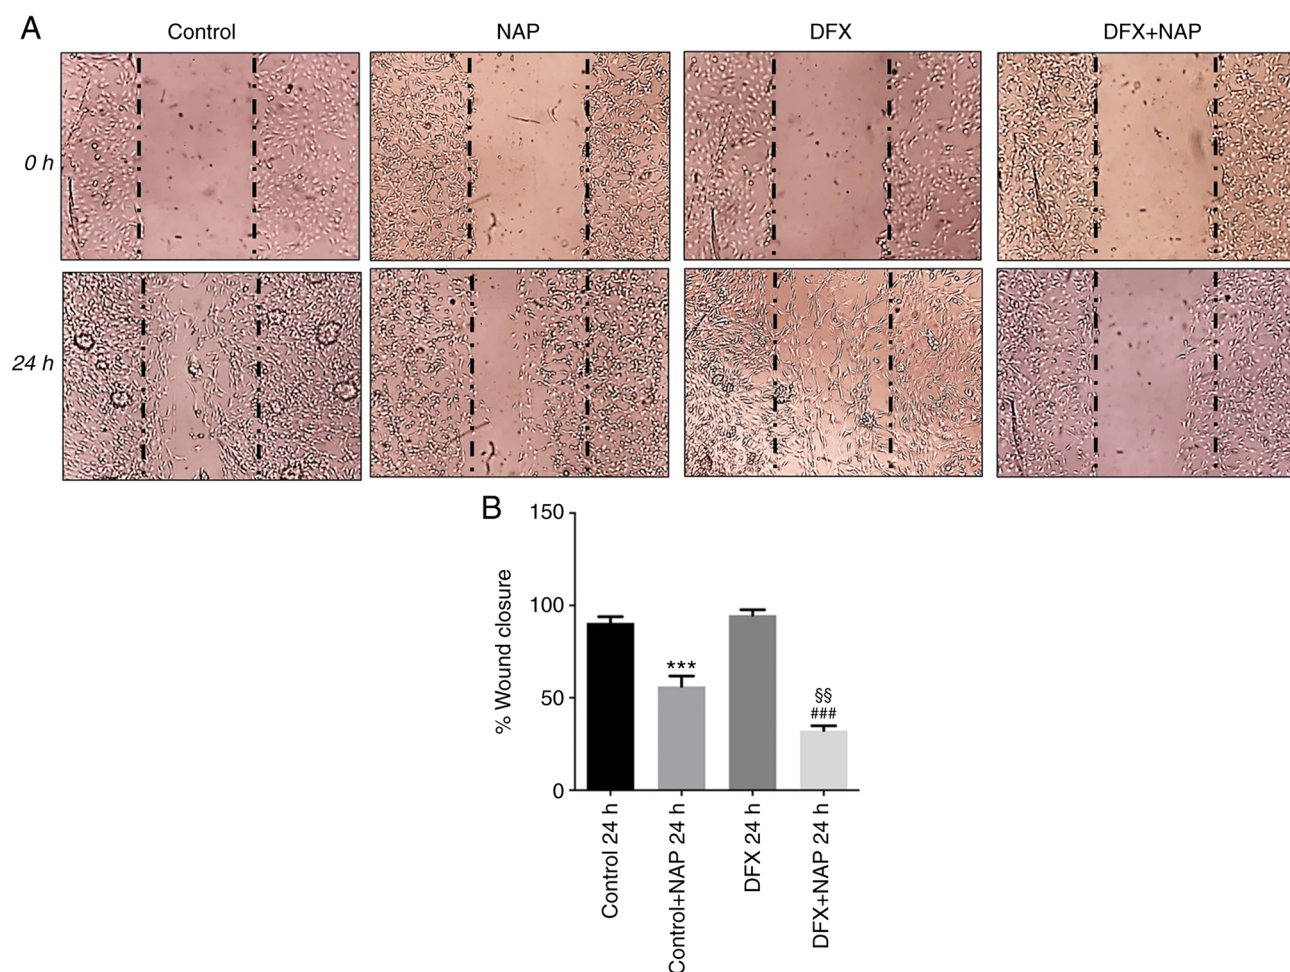

Supplement: Supplementary file 1 [file downloadSupplementary]
